# Supplementary material
Source: PubMed Central journal article supplement (PMC6124436)
Supplement: jciinsight-3-120178-s031.pdf [file jciinsight-3-120178-s031.pdf]

## Logistic coefficients

Deviance Residuals:

| Min     | 1Q      | Median  | 3Q      | Max    |
|---------|---------|---------|---------|--------|
| -1.1190 | -0.3989 | -0.3354 | -0.2830 | 2.8149 |

Coefficients:

|                             | Estimate | Std. Error | z value | Pr(> z ) |     |
|-----------------------------|----------|------------|---------|----------|-----|
| (Intercept)                 | 4.086    | 1.073      | 3.806   | 0.000141 | *** |
| mydata\$Volume_rw_mom_sga10 | -6.865   | 1.107      | -6.202  | 5.59e-10 | *** |

---

Signif. codes: 0 '\*\*\*' 0.001 '\*\*' 0.01 '\*' 0.05 '.' 0.1 ' ' 1

(Dispersion parameter for binomial family taken to be 1)

Null deviance: 1158.8 on 2392 degrees of freedom  
Residual deviance: 1121.0 on 2391 degrees of freedom  
AIC: 1125

Number of Fisher Scoring iterations: 5
